# Supplementary material for: Conserved RNA-Binding Proteins Required for Dendrite Morphogenesis in Caenorhabditis elegans Sensory Neurons
Source: PubMed Central journal article supplement (PMC4390579; doi:10.1534/g3.115.017327), 2015-02-10
Supplement: supp_g3.115.017327_017327SI.pdf [file supp_g3.115.017327_017327SI.pdf]

**Conserved RNA-Binding Proteins Required for Dendrite Morphogenesis in  
*Caenorhabditis elegans* Sensory Neurons**

Simona Antonacci\*, Daniel Forand<sup>#</sup>, Margaret Wolf\*, Courtney Tyus\*, Julia Barney\*,  
Leah Kellogg\*, Margo A. Simon\*, Genevieve Kerr\*, Kristen L. Wells\*, Serena Younes<sup>#</sup>,  
Nathan T. Mortimer<sup>§</sup>, Eugenia C. Olesnicky<sup>#</sup>, Darrell J. Killian\*

\* Department of Molecular Biology, Colorado College, Colorado Springs, CO, 80903

<sup>#</sup> Department of Biology, University of Colorado Colorado Springs, Colorado Springs,  
CO, 80918

<sup>§</sup> Department of Biological Sciences, University of Denver, Denver, CO, 80208

Corresponding authors: Eugenia C. Olesnicky, Department of Biology, University of  
Colorado Colorado Springs, 1420 Austin Bluffs Parkway, Colorado Springs, CO 80918.

Email: [eolesnic@uccs.edu](mailto:eolesnic@uccs.edu); Darrell J. Killian, Department of Molecular Biology, Colorado  
College, 14 East Cache La Poudre Street, Colorado Springs, CO 80903. Email:

[darrell.killian@coloradocollege.edu](mailto:darrell.killian@coloradocollege.edu)

**DOI: 10.1534/g3.115.017327**

**Table S1 List of RBP genes screened**

| <i>C. elegans</i><br>RBP | <i>Drosophila</i><br>RBP | BLASTP E<br>value | Allele                  | Reference                   | RNAi       |
|--------------------------|--------------------------|-------------------|-------------------------|-----------------------------|------------|
| B0336.3                  | Swm                      | 3.00E-16          | <i>gk910</i>            | UBC                         | III-3A15   |
| B0511.6                  | Pit                      | 1.00E-175         | <i>ok2948</i>           | UBC                         | This study |
| C25A1.4                  | Rump                     | 1.00E-46          | none                    |                             | I-5G19     |
| C30B5.4                  | CG10466                  | 2.00E-48          | <i>gk3082</i>           | UBC                         | II-4J09    |
| C44B7.2                  | Sm                       | 3.00E-69          | none                    |                             | This study |
| C46F11.4                 | CG6418                   | 0.00E+00          | none                    |                             | III-1H08   |
| C56G2.1                  | Spoon/Yu                 | 3.00E-30          | <i>tm3447</i>           | NBRP                        |            |
| CGH-1                    | Gem3                     | 6.00E-61          | <i>ok492</i>            | UBC                         |            |
| CPB-3                    | Orb                      | 7.00E-64          | <i>bt17</i>             | Hasegawa <i>et al.</i> 2006 |            |
| CYN-13                   | Cyp33                    | 5.00E-124         | none                    |                             | This study |
| D1037.1                  | Loq                      | 6.00E-09          | <i>ok1746</i>           | OMRF                        |            |
| DDX-17                   | CG10777                  | 5.00E-160         | <i>tm3202</i>           | NBRP                        | This study |
| DCR-1                    | Dcr-1                    | 3.00E-124         | <i>ok247</i>            | OMRF                        |            |
| DRSH-1                   | Drosha                   | 0.00E+00          | <i>ok369</i>            | UBC                         |            |
| ETR-1                    | Aret/Bru                 | 9.00E-118         | <i>tm6221</i>           |                             | II-1G15    |
| EXC-7                    | Ssx                      | 1.00E-47          | <i>ok370</i>            |                             |            |
| F13E9.1                  | CG5439                   | 2.00E-08          | <i>tm1886</i>           | NBRP                        |            |
| F26B1.2                  | Bl                       | 2.00E-39          | <i>tm5522</i>           | NBRP                        |            |
| F57B10.8                 | CG32706                  | 3.00E-11          | none                    |                             | I-3M23     |
| FUST-1                   | CG14718                  | 2.00E-08          | <i>tm4439</i>           | NBRP                        |            |
| HEL-1                    | Hel25E                   | 0.00E+00          | <i>ok3698</i>           |                             | II-6I01    |
| HRPF-1                   | CG11726                  | 8.00E-06          | <i>tm3406</i>           | NBRP                        |            |
| K08F4.2                  | Rin                      | 3.00E-10          | none                    |                             | IV-5G18    |
| LARP-5                   | CG11505                  | 8.00E-33          | <i>gk939577/463873*</i> | Thompson <i>et al.</i> 2013 | I-1H07     |

|           |          |           |                   |                             |            |
|-----------|----------|-----------|-------------------|-----------------------------|------------|
| MBL-1     | Mbl      | 5.00E-45  | <i>tm1563</i>     | NBRP                        |            |
| MTR-4     | L(2)35Df | 0.00E+00  | <i>ok2642</i>     | OMRF                        |            |
| NCL-1     | Brat     | 2.00E-172 | <i>e1942</i>      | Frank & Roth 1998           |            |
| NOS-1     | Nos      | 1.00E-07  | <i>ok250</i>      | OMRF                        |            |
| PUF-9     | Pum      | 6.00E-128 | <i>ok1136</i>     | UBC                         |            |
| R05D11.4  | CG5589   | 6.00E-112 | none              |                             | I-4A04     |
| R11A8.7   | MASK     | 2.00E-154 | <i>tm5136</i>     | NBRP                        |            |
| RNP-3     | Snf      | 5.00E-70  | <i>ok1424</i>     | OMRF                        |            |
| RPS-3     | RpS3     | 6.00E-124 | none              |                             | III-3C02   |
| RSP-3     | SF2      | 4.00E-59  | <i>ok2927</i>     | UBC                         |            |
| RSP-6     | X16      | 3.00E-22  | <i>ok798</i>      | UBC                         |            |
| RSP-7     | Srp54    | 8.00E-45  | <i>ok2079</i>     | UBC                         | II-7O08    |
| SAP-49    | CG11454  | 5.00E-10  | none              |                             | II-5N14    |
| SET-2     | Set1     | 4.00E-68  | <i>n4589</i>      | Andersen & Horvitz 2007     |            |
| SQD-1     | Sqd      | 3.00E-41  | <i>ok1582</i>     | UBC                         |            |
| STAU-1    | Stau     | 1.00E-42  | <i>tm2266</i>     | NBRP                        |            |
| SUP-26    | Shep     | 6.00E-52  | <i>gk426</i>      | UBC                         |            |
| SYM-2     | Glo      | 3.00E-32  | <i>mn617</i>      | Yochem <i>et al.</i> 2004   |            |
| T08B2.5   | CG4887   | 2.00E-23  | <i>gk721</i>      | UBC                         | I-2P02     |
| T28D6.4   | Mib2     | 7.00E-23  | <i>tm926</i>      | NBRP                        |            |
| TIAR-1    | CG34354  | 1.00E-77  | <i>tm361</i>      | NBRP                        |            |
| UAF-2     | U2AF38   | 9.00E-90  | <i>gk3159</i>     | UBC                         | IV-8I21    |
| W04D2.6   | CG4119   | 8.00E-28  | <i>tm2681</i>     | NBRP                        |            |
| WDFY-2    | CG5168   | 2.00E-98  | <i>tm3806</i>     | NBRP                        |            |
| Y23H5B.6  | CG5800   | 1.00E-172 | none              |                             | This study |
| Y55F3AM.3 | CG11266  | 1.00E-97  | <i>gk454899**</i> | Thompson <i>et al.</i> 2013 | IV-8L05    |
| Y55F3BR.1 | Ddx1     | 0.00E+00  | none              |                             | IV-1G20    |
| ZC190.4   | Smg      | 7.00E-17  | none              |                             | This study |

|         |        |          |               |      |            |
|---------|--------|----------|---------------|------|------------|
| ZC434.3 | CG9107 | 1.00E-11 | none          |      | This study |
| ZK686.2 | Dbp73D | 4.00E-59 | <i>tm5978</i> | NBRP |            |

---

*C. elegans* RBPs are the best homologs of *Drosophila* RBPs reported by Olesnicky *et al.* (2014) by BLASTp search (E values are given). Sources of alleles are indicated above. Abbreviations: (NBRP) the Mitani Lab through the *C. elegans* National Bioresource Project of Japan; (UBC) *C. elegans* Reverse Genetics Core Facility at the University of British Columbia, (OMRF) *C. elegans* Reverse Genetics Core Facility at the Oklahoma Medical Research Foundation. UBC and OMRF are part of the international *C. elegans* Gene Knockout Consortium. RNAi clones (clone location given) are from the Ahringer library (Geneservice LTD; Fraser *et al.* 2000; Kamath *et al.* 2003) or were constructed for this study (plasmid construction described in Table S2).

\**gk939577/gk463873* results in a conceptual translation of the first 436 amino acids unchanged followed by 3 missense changes and a stop codon. There are 308 codons after the stop. The LA domain and the LARP4/5-like domain are within the first 436 amino acids.

\*\**gk454899* is a single missense change R251C in a residue conserved in flies, fish, and mammals. The residue does not fall within anRNA recognition motif (RRM) but falls in a region between two RRM.

**Table S2 List of sequences and sources for transgene construction****A. Primer sequences for GFP transcriptional fusions**

| Regulatory region | Forward primer (5' to 3')                   | Reverse primer (5' to 3')                  |
|-------------------|---------------------------------------------|--------------------------------------------|
| <i>cgh-1</i>      | <i>SphI</i> - tatcacagatttctggtgaatatgagg   | <i>KpnI</i> - ttccgatgctgtagtaggtttgatttc  |
| <i>cpb-3</i>      | <i>SphI</i> - accggaggaagcttggtgaagcaatg    | <i>KpnI</i> - ggtgaatgctttatcaacggc        |
| <i>dcr-1</i>      | <i>SphI</i> - aggattaaaatctgaacatattgcccg   | <i>KpnI</i> - tattggtctgaaaacagggaaaattgat |
| <i>ddx-17</i>     | <i>attB1</i> - gtattcgtgacgtcactgcg         | <i>attB2</i> - ttcctctgtctcccattgtc        |
| <i>larp-5</i>     | <i>attB1</i> - tccactctccattacgttcgggc      | <i>attB2</i> - ctccgaaaaggagcgtcgcgccc     |
| <i>mb1-1</i>      | <i>attB1</i> - tttgggattacttcggtgctc        | <i>attB2</i> - ccgatcgtgctgattgtcc         |
| <i>mtr-4</i>      | <i>SphI</i> - tcgccacgaaaccacaccaaaccggcgag | <i>KpnI</i> - ttagtctgaaaaatgtgccacaataaaa |
| <i>rsp-3</i>      | <i>attB1</i> - gccctatcttaaatggccgg         | <i>attB2</i> - gtttagtactgaaaatgaag        |
| <i>rsp-6</i>      | <i>attB1</i> - gtgtaaatgtgatgcattcgag       | <i>attB2</i> - actgaaaaatcaaattaatttatg    |
| <i>set-2</i>      | <i>attB1</i> - tgaatagcaaacttcatatcc        | <i>attB2</i> - ttccatcaattatttattgatgc     |
| <i>Y55F3AM.3</i>  | <i>attB1</i> - tcaaattgatgttctattcgc        | <i>attB2</i> - ggagctgaccccgtctcaaa        |

For *sup-26*, an existing transgene, *smIs259[P<sub>sup-26</sub>::sup-26 cDNA::GFP]*, was used (Mapes *et al.* 2010).

**B. Primer sequences for GFP translational fusions to GFP**

| cDNA (source)                          | Forward primer (5' to 3')                | Reverse primer (5' to 3')                 |
|----------------------------------------|------------------------------------------|-------------------------------------------|
| <i>cgh-1</i><br>(yk85e1, yk1658a03)    | <i>attB1</i> - atgagtgagcggagcaacaacag   | <i>attB2</i> - agcagtggtctcatcgccggc      |
| <i>cpb-3</i><br>(this study)           | <i>attB1</i> - atgaacctgaatgaccgagtggaag | <i>attB2</i> - accggaggaagcttggtgaagcaatg |
| <i>ddx-17</i><br>(this study)          | <i>attB1</i> - atgggagacagaggatacggagg   | <i>attB2</i> - ccatcgccaccctccaccgctgc    |
| <i>larp-5</i><br>(yk1291c05, yk400c5)  | <i>attB1</i> - atggacacgftcagctcgactcg   | <i>attB2</i> - cctgaacgtcggtttttgtggcgg   |
| <i>mb1-1</i><br>(this study)           | <i>attB1</i> - atgttcgacgaaaacagtaatgccg | <i>attB2</i> - gaatggtggtgctgcatgtac      |
| <i>mtr-4</i><br>(yk506b7, yk430a11)    | <i>attB1</i> - atggccgatcttttcgacgaattc  | <i>attB2</i> - tagatagagagatgcagcgaaaac   |
| <i>rsp-3</i><br>(yk1100h10, yk1195c10) | <i>attB1</i> - atgccacgcccggctcagagg     | <i>attB2</i> - ttgtggagatggtgagcgagatgg   |

|                                     |                                       |                                          |
|-------------------------------------|---------------------------------------|------------------------------------------|
| <i>rsp-6</i><br>(this study)        | <i>attB1</i> - atggacgccaaggtgtacgtcg | <i>attB2</i> - gtgCGGagaagcagaacggctgc   |
| <i>set-2</i><br>(yk21g8, yk320e10)  | <i>attB1</i> - atgtccacacatgatatgaacc | <i>attB2</i> - attaagatatccacgacacgtc    |
| <i>sup-26</i><br>(D. Xue, J. Mapes) | <i>attB1</i> - atgaacgcatctcggctccac  | <i>attB2</i> - ttgtggattcatcggctggaaatac |
| <i>Y55F3AM.3</i><br>(this study)    | <i>attB1</i> - atgaccgacggatcgatgg    | <i>attB2</i> - atatctgcatatccaccatattg   |

---

### C. Primer sequences for RNAi vectors

| RNAi target     | Forward primer (5' to 3')                    | Reverse primer (5' to 3')                     |
|-----------------|----------------------------------------------|-----------------------------------------------|
| <i>B0511.6</i>  | <i>attB1</i> - gcattgacgtcaagaagaaggtgc      | <i>attB2</i> - ccacccatcactaatccatacg         |
| <i>C44B7.2</i>  | <i>attB1</i> - atgcaaggaagaggcggatatcatcacg  | <i>attB2</i> - atctggaagagtgaagtctcgttgatc    |
| <i>cyn-13</i>   | <i>attB1</i> - aattccagctccgccacacaatgcccg   | <i>attB2</i> - taagtctccatagcctgCGgaagcggc    |
| <i>ddx-17</i>   | <i>attB1</i> - tggctgCCgagaacctta            | <i>attB2</i> - caattcacgagttggaagca           |
| <i>rps-3</i>    | <i>attB1</i> - cgtgaccaagaagaagaaggccg       | <i>attB2</i> - gatgtagtCGttgactgggtgtcc       |
| <i>Y23H5B.6</i> | <i>attB1</i> - tatgcctcacacaaacggaaaaggcggcg | <i>attB2</i> - atttgtgcaaactctgcacaaatcctg    |
| <i>ZC190.4</i>  | <i>attB1</i> - tatcttgatactggctgaaaagttgcg   | <i>attB2</i> - tacacaactgggtatgatgaagggcac    |
| <i>ZC434.3</i>  | <i>attB1</i> - tatgcgtctcgtgaaaccactgatagtgg | <i>attB2</i> - ctagttatttctgagttgtcttcgaaaatc |

Genomic fragments PCR-amplified with primers sequences given were cloned into pDONR221 with a BP reaction and then cloned into a double-T7 plasmid with a Gateway entry site (modified from pPD129.36) using an LR reaction (Invitrogen).
