# Supplementary material for: Conserved RNA-Binding Proteins Required for Dendrite Morphogenesis in Caenorhabditis elegans Sensory Neurons
Source: PubMed Central journal article supplement (PMC4390579; doi:10.1534/g3.115.017327), 2015-02-10
Supplement: supp_g3.115.017327_TableS2.pdf [file supp_g3.115.017327_TableS2.pdf]

**Table S2 List of sequences and sources for transgene construction****A. Primer sequences for GFP transcriptional fusions**

| Regulatory region | Forward primer (5' to 3')                   | Reverse primer (5' to 3')                  |
|-------------------|---------------------------------------------|--------------------------------------------|
| <i>cgh-1</i>      | <i>SphI</i> - tatcacagatttctggtgaatatgagg   | <i>KpnI</i> - ttccgatgctgtagtaggtttgatttc  |
| <i>cpb-3</i>      | <i>SphI</i> - accggaggaagcttggtgaagcaatg    | <i>KpnI</i> - ggtgaatgctttatcaacggc        |
| <i>dcr-1</i>      | <i>SphI</i> - aggattaaaatctgaacatattgcccg   | <i>KpnI</i> - tattggtctgaaaacagggaaaattgat |
| <i>ddx-17</i>     | <i>attB1</i> - gtattcgtgacgtcactgcg         | <i>attB2</i> - ttcctctgtctcccattgtc        |
| <i>larp-5</i>     | <i>attB1</i> - tccactctccattacgttcgggc      | <i>attB2</i> - ctccgaaaagggacgtcgcgccc     |
| <i>mb1-1</i>      | <i>attB1</i> - tttgggattacttcggtgctc        | <i>attB2</i> - ccgatcgtgctgattgtcc         |
| <i>mtr-4</i>      | <i>SphI</i> - tcgccacgaaaccacaccaaaccggcgag | <i>KpnI</i> - ttagtctgaaaaatgtgccacaataaaa |
| <i>rsp-3</i>      | <i>attB1</i> - gccctatcttaaatggccgg         | <i>attB2</i> - gtttagtacctgaaaatgaag       |
| <i>rsp-6</i>      | <i>attB1</i> - gtgtaaatgtgatgcattcgag       | <i>attB2</i> - actgaaaaatcaaattaatttatg    |
| <i>set-2</i>      | <i>attB1</i> - tgaatagcaaacttcatatcc        | <i>attB2</i> - ttccatcaattatttattgatgc     |
| <i>Y55F3AM.3</i>  | <i>attB1</i> - tcaaattgatgttctattcgc        | <i>attB2</i> - ggagctgaccccgtctcaaa        |

For *sup-26*, an existing transgene, *smIs259[P<sub>sup-26</sub>::sup-26 cDNA::GFP]*, was used (Mapes *et al.* 2010).

**B. Primer sequences for GFP translational fusions to GFP**

| cDNA (source)                          | Forward primer (5' to 3')                | Reverse primer (5' to 3')                 |
|----------------------------------------|------------------------------------------|-------------------------------------------|
| <i>cgh-1</i><br>(yk85e1, yk1658a03)    | <i>attB1</i> - atgagtggagcggagcaacaacag  | <i>attB2</i> - agcagtggctcatcgccggc       |
| <i>cpb-3</i><br>(this study)           | <i>attB1</i> - atgaacctgaatgaccgagtggaag | <i>attB2</i> - accggaggaagcttggtgaagcaatg |
| <i>ddx-17</i><br>(this study)          | <i>attB1</i> - atgggagacagaggatacggagg   | <i>attB2</i> - ccatcggccacctccaccgctgc    |
| <i>larp-5</i><br>(yk1291c05, yk400c5)  | <i>attB1</i> - atggacacgttcgagctcgactcg  | <i>attB2</i> - cctgaacgtcggtttttgtggcgg   |
| <i>mb1-1</i><br>(this study)           | <i>attB1</i> - atgttcgacgaaaacagtaatgccg | <i>attB2</i> - gaatggtggtgctgcatgtac      |
| <i>mtr-4</i><br>(yk506b7, yk430a11)    | <i>attB1</i> - atggccgatcttttcgacgaattc  | <i>attB2</i> - tagatagagagatgcagcgaaaac   |
| <i>rsp-3</i><br>(yk1100h10, yk1195c10) | <i>attB1</i> - atgccacgcccggctcagagg     | <i>attB2</i> - ttgtggagatggtgagcgagatgg   |

|                                     |                                       |                                          |
|-------------------------------------|---------------------------------------|------------------------------------------|
| <i>rsp-6</i><br>(this study)        | <i>attB1</i> - atggacgccaaggtgtacgtcg | <i>attB2</i> - gtgCGGagaagcagaacggctgc   |
| <i>set-2</i><br>(yk21g8, yk320e10)  | <i>attB1</i> - atgtccacacatgatatgaacc | <i>attB2</i> - attaagatatccacgacacgtc    |
| <i>sup-26</i><br>(D. Xue, J. Mapes) | <i>attB1</i> - atgaacgcatctcggctccac  | <i>attB2</i> - ttgtggattcatcggctggaaatac |
| <i>Y55F3AM.3</i><br>(this study)    | <i>attB1</i> - atgaccgacggatcgatgg    | <i>attB2</i> - atatctgccatatccaccatattg  |

---

### C. Primer sequences for RNAi vectors

| RNAi target     | Forward primer (5' to 3')                    | Reverse primer (5' to 3')                     |
|-----------------|----------------------------------------------|-----------------------------------------------|
| <i>B0511.6</i>  | <i>attB1</i> - gcattgacgtcaagaagaaggtgc      | <i>attB2</i> - ccacccatcactaatccatacg         |
| <i>C44B7.2</i>  | <i>attB1</i> - atgcaaggaagaggcggatatcatcacg  | <i>attB2</i> - atctggaagagtgaagtctcgttgatc    |
| <i>cyn-13</i>   | <i>attB1</i> - aattccagctccgccacacaatgccg    | <i>attB2</i> - taagtctccatagcctgCGgaagcggc    |
| <i>ddx-17</i>   | <i>attB1</i> - tggctgcccgagaacctta           | <i>attB2</i> - caattcacgagttggaagca           |
| <i>rps-3</i>    | <i>attB1</i> - cgtgaccaagaagaagaaggccg       | <i>attB2</i> - gatgtagtCGttgactgggtgtcc       |
| <i>Y23H5B.6</i> | <i>attB1</i> - tatgcctcacacaaacggaaaaggcggcg | <i>attB2</i> - atttgtgcaaactctgcacaaatcctg    |
| <i>ZC190.4</i>  | <i>attB1</i> - tatcttgatactggctgaaaagttgcg   | <i>attB2</i> - tacacaactgggtatgatgaagggcac    |
| <i>ZC434.3</i>  | <i>attB1</i> - tatgcgtctcgtgaaaccactgatagtgg | <i>attB2</i> - ctagttatttctgagttgtcttcgaaaatc |

Genomic fragments PCR-amplified with primers sequences given were cloned into pDONR221 with a BP reaction and then cloned into a double-T7 plasmid with a Gateway entry site (modified from pPD129.36) using an LR reaction (Invitrogen).
